# Supplementary material for: Cyanobacteria as Natural Therapeutics and Pharmaceutical Potential: Role in Antitumor Activity and as Nanovectors
Source: MDPI journal article supplement (doi:10.3390/molecules26010247), 2021-01-05
Supplement: s1 [file s1]

**Table S1: Clinical trials involving cyanobacterial-derived compounds, which are recruiting, completed or terminated.**

| NCT Number <sup>a</sup> | Official Title                                                                                                                                                                                                               | Conditions                                                     | Phase               | Study Design                                                                                                                          | Start Date and End Date                      | Responsible, Country                                    |
|-------------------------|------------------------------------------------------------------------------------------------------------------------------------------------------------------------------------------------------------------------------|----------------------------------------------------------------|---------------------|---------------------------------------------------------------------------------------------------------------------------------------|----------------------------------------------|---------------------------------------------------------|
| NCT03664323             | Efficacy of Chemotherapy or Chemo-anti-PD-1 Combination After Failed Anti-PD-1 Therapy for Relapsed and Refractory Hodgkin Lymphoma: a Series From Lysa Centers.                                                             | Hodgkin Lymphoma                                               | n.a. <sup>b</sup>   | Observational Model: Cohort (30 individuals)<br>Time Perspective: Retrospective                                                       | January 2018<br><br>Completed June 2018      | Hospices Civils de Lyon, France                         |
| NCT02098512             | A Multicenter Pilot Study of Reduced Intensity Conditioning and Allogeneic Stem Cell Transplantation Followed by Targeted Immunotherapy in Children, Adolescents and Young Adults with Poor Risk CD30+ Hodgkin Lymphoma (HL) | Hodgkin Lymphoma                                               | Phase I<br>Phase II | Intervention Model: Single Group Assignment<br>Masking: None (Open Label)<br>Primary Purpose: Treatment                               | March 2014<br><br>recruiting                 | New York Medical College, USA                           |
| NCT02713828             | A Phase I/II Study of Glembatumumab Vedotin in Patients With gpNMB-Expressing, Advanced or Metastatic Squamous Cell Carcinoma of the Lung                                                                                    | Squamous Cell Carcinoma of the Lung                            | Phase I<br>Phase II | Allocation: Non-Randomized<br>Intervention Model: Parallel Assignment<br>Masking: None (Open Label)<br>Primary Purpose: Treatment     | April 2016<br><br>Terminated September 2018  | PrECOG, LLC, USA<br><br>Several Institutions in the USA |
| NCT02487979             | A Phase 2 Study of GPNMB-Targeted Antibody-Drug Conjugate, CDX-011 (Glembatumumab Vedotin, CR011-vcMMAE; NSC# 763737), in Recurrent or Refractory Osteosarcoma                                                               | Recurrent Osteosarcoma                                         | Phase II            | Allocation: N/A<br>Intervention Model: Single Group Assignment<br>Masking: None (Open Label)<br>Primary Purpose: Treatment            | February 2016<br><br>Completed June 2017     | National Cancer Institute, USA                          |
| NCT02302339             | A Phase 2 Study of Glembatumumab Vedotin, an Anti-gpNMB Antibody-drug Conjugate, as Monotherapy or in Combination With Immunotherapies in Patients With Advanced Melanoma                                                    | Melanoma                                                       | Phase II            | Allocation: Non-Randomized<br>Intervention Model: Single Group Assignment<br>Masking: None (Open Label)<br>Primary Purpose: Treatment | November 2014<br><br>Terminated October 2018 | Celldex Therapeutics, USA                               |
| NCT02363283             | A Phase 2 Study of CDX-011 (Glembatumumab Vedotin) for Metastatic Uveal Melanoma                                                                                                                                             | Recurrent Uveal Melanoma;<br>Stage IV Uveal Melanoma AJCC v7   | Phase II            | Allocation: N/A<br>Intervention Model: Single Group Assignment<br>Masking: None (Open Label)<br>Primary Purpose: Treatment            | September 2015<br><br>Completed July 2018    | National Cancer Institute, USA                          |
| NCT01997333             | A Randomized Multicenter Pivotal Study of CDX-011 (CR011-vcMMAE)in Patients With Metastatic, gpNMB Over-Expressing, Triple Negative Breast Cancer (The METRIC Study)                                                         | Metastatic gpNMB Over-expressing Triple Negative Breast Cancer | Phase II            | Allocation: Randomized<br>Intervention Model: Parallel Assignment<br>Masking: None (Open Label)<br>Primary Purpose: Treatment         | November 2013<br><br>Completed August 2018   | Celldex Therapeutics, USA                               |

|             |                                                                                                                              |                                                   |                     |                                                                                                                                  |                                             |                              |
|-------------|------------------------------------------------------------------------------------------------------------------------------|---------------------------------------------------|---------------------|----------------------------------------------------------------------------------------------------------------------------------|---------------------------------------------|------------------------------|
| NCT01156753 | A Phase II, Randomized, Multicenter Study of CDX-011 (CR011-vcMMAE) in Patients With Advanced GPNMB-expressing Breast Cancer | Breast Cancer                                     | Phase II            | Allocation: Randomized<br>Intervention Model: Parallel<br>Assignment<br>Masking: None (Open Label)<br>Primary Purpose: Treatment | July 2010<br><br>Completed<br>November 2012 | Celldex Therapeutics,<br>USA |
| NCT00412828 | A Phase I/II Study of CR011-vcMMAE in Subjects With Unresectable Stage III or Stage IV Melanoma                              | Unresectable Stage<br>III or Stage IV<br>Melanoma | Phase I<br>Phase II | Allocation: N/A<br>Intervention Model: Single<br>Group Assignment<br>Masking: None (Open Label)<br>Primary Purpose: Treatment    | June 2006<br><br>Completed<br>May 2011      | Celldex Therapeutics,<br>USA |
| NCT00704158 | A Phase I/II Study of CR011-vcMMAE in Patients With Locally Advanced or Metastatic Breast Cancer                             | Breast Cancer                                     | Phase I<br>Phase II | Allocation: N/A<br>Intervention Model: Single<br>Group Assignment<br>Masking: None (Open Label)<br>Primary Purpose: Treatment    | June 2008<br><br>Completed<br>June 2011     | Celldex Therapeutics,<br>USA |

<sup>a</sup> NCT, Number Clinical Trials (identifier); b n.a., not applicable. Source “ClinicalTrials.gov” database [1].

1. ClinicalTrials.gov is a database of privately and publicly funded clinical studies conducted around the world. It is a resource provided by the United States National Library of Medicine. Available online: <https://clinicaltrials.gov/> (accessed on December 10<sup>th</sup> 2020).
